# Supplementary material for: Does it take two to tango? RING domain self-association and activity in TRIM E3 ubiquitin ligases
Source: Oxford University Press journal article supplement (doi:10.1042/bst20200383), 2020-11-10
Supplement: bst-2020-0383c_supp.pdf [file bst-2020-0383c_supp.pdf]

|                    |                                                                                |                                               |
|--------------------|--------------------------------------------------------------------------------|-----------------------------------------------|
| TRIM1 (Q9UJV3)     | MGESFASVVLNASGGL-----FSLKMETLESELTPICILELFD-----PILL-PGASISLGFSAHRILVSSC       | FQCTCRVYVLSNHRG-LDGLK-RNVTLQNIIDRFQKA--SV     |
| TRIM2 (Q9C040)     | MASEG-----TNIPG-----PVVQRIKDKQFLKISICILEYRKN-----PKVL-PGLTFTCEERLQNYIPAHS      | LSCFVCRQTSILPEKG-VAALQ-NNFFITNLMQVLRQT--PG    |
| TRIM3 (Q75382)     | MAKRE-----DSPG-----FEVQPMKQRFVLSICILDYRQC-----PKVL-PGLTFTCEERLQNYIPAQS         | LSCFVCRQTSILPEQG-VSALQ-NNFFISLSMEAMQQA--PD    |
| TRIM4 (Q9C037)     | ME-----AEDIQEELTFCPIGLDYFD-----PVSI-EGGNFRCGLLHRNWAFFG                         | FFCFEHRHPSA-----PAAIR-PHWALARITEKTRR--RL      |
| TRIM5 (Q9C035)     | NA-----SGLLVNKRVEVTPICILELLTQ-----PLSL-DGHSFRCAGLNTANHKKSM                     | SSCFVCRISYQ-----PENIR-PNRIVANIVEKLEVV--KL     |
| TRIM6 (Q9C030)     | MT-----SPVLVDIREEVTPICILELLTE-----PLSI-DGHSFRCAGLITPNGRESV                     | RGCFVQCTSYQ-----PGLNR-PNRHLANIVRRLREVV--VL    |
| TRIM7 (Q9C029)     | MAAVGPRTPGGTGAEA-----LALAEALQGEATFCPIGLELFRE-----PVSV-EGHSFRCAGIIGRCMERPG      | LPFCQCREPAR-----PSQLR-PNRQLAAGVATLRLRF--SL    |
| TRIM8 (Q9BZ89)     | MA-----ENWKNCFEELTFCPIGLHVFVE-----PVQL-PKKNFRCAGIIGEAWAKDS                     | VRCFEONQAYNQ-----KPGLE-KNKLKTNIVEKFNAL--HV    |
| TRIM9 (Q9C026)     | -----MEMEELKFCVPCGSFYRE-----PILL-PGSHNLQAGARNLVQTP                             | ITCFEHRSLLDLDRG-LRGFF-PNRVLGGVDRYQQS--KA      |
| TRIM10 (Q9UDY6)    | MAS-----AASVTLAEAVNFCPIQGTFLRE-----PVTI-DGHNFRCAGLTRVYCEIPG                    | PTCFPLCKEPPR-----PGSFR-PNWQLANVVENIERL--QL    |
| TRIM11 (Q96F44)    | MAA-----PDLSTNLQEEATCAICLDYFTD-----PVMT-DGHNFRCAGLTRVYCEIPG                    | YACFECRELSLSP-----QRNLR-PNRHLANIVRRLREVV--KL  |
| TRIM13 (Q60858)    | -----MELLEEDLTCPICCSLFD-----PVVL-PGSHNFRCAGLTRVYCEIPG                          | FKCFCTCRKETSATG-----INSLQ-VNYSKLGIVKYEKNI--KI |
| TRIM15 (Q9C019)    | MPA-----TSLKRVHVELPACTICAGPLED-----AVTI-PGHTFRCALIPALSQMGA                     | LLCFLOQEEEQ-----AETPM-APVPLGAVTETCEE--HG      |
| TRIM17 (Q9Y577)    | MEA-----VELARKQGEATFCPIGLDYFD-----PVMT-TGHNFRCAGLTRVYCEIPG                     | FFCFEHRHPSA-----QRNLR-PNRLLTKVAEMAQOH--PG     |
| TRIM18 (Q15344)    | -----METLESELTPICILELFD-----PILL-PGASISLGFSAHRILVSHC                           | FQCTCRSHVITLSQRG-LDGLK-RNVTLQNIIDRFQKA--SV    |
| TRIM19 (P29590)    | -----TER-----APASSEEFQFLRCCQAEARCK-----PKLL-PGLTFTCEERLQNYIPAQS                | MCFPTIQAFWF--LGA-DTPAL-DWFFESLQRLRLSVY--KA    |
| TRIM21 (P19474)    | MAS-----AARLTMMEEVTPICILEPFVE-----PVSI-EGHSFRCAGLITPNGRESV                     | SVCFVCRQLF-----LKNLR-PNRQLANVVENIERL--QL      |
| TRIM22 (Q81Y49)    | ND-----FSVKVDIEKVTFCPIGLELLTE-----PLSL-DGHSFRCAGLITPNGRESV                     | SSEFVQCTRFQ-----PGLNR-PNRHLANIVRRLREVV--KL    |
| TRIM23 (P36406)    | NATLNVNKLGAAGVDSGR-----QSGRTAVVVKLQGVQVDFSLQG--DKVPRLL-DGHSFRCAGLITPNGRESV     | IRCFPQVOTLDGDSG-VWGLK-KNFALLELELRLQNG--PI     |
| TRIM24 (Q15164)    | SER-----GGEAARLMLLDTCAVQHNIQSR-----APKLL-PGLHSPFCAGLIPAPORYLM                  | IRCFVCSQEA-----ERHII-DNFFVTKTDEVTST--VE       |
| TRIM25 (Q14258)    | MA-----ELCPFAEELSCSICILEPFKE-----PVTT-PGHNFRCAGLTRVYCEIPG                      | YLCFQRAVYQA-----RQLHL-KNVTLCNVVEQFLQA--DL     |
| TRIM26 (Q12899)    | MAT-----SAPLRSLEEVTPICILDYLRD-----PVTI-DGHNFRCAGLTRVYCEIPG                     | PVCFCKRKFPP-----KRNLR-PNRHLANIVRRLREVV--KL    |
| TRIM27 (P14373)    | MAS-----GSVAELQEEVTPICILELQYFAE-----PMML-DGHNFRCAGLTRVYCEIPG                   | VSCFQCRETFP-----QRHMR-PNRHLANIVRRLREVV--KL    |
| TRIM28 (Q13263)    | -----GAELALELHCGVCRELRPE-----REPRLL-PGLHSPFCAGLIPAPORYLM                       | VDFCFVQKQCF-----SKIDVENYFMR--DS               |
| TRIM31 (Q9BZ79)    | MAS-----GQFVNLQEEVTPICILDILQK-----PVTI-DGHNFRCAGLTRVYCEIPG                     | FKCFPLCKTSVR-----KNAIR-FNSLLRNIVEKIQAL--EA    |
| TRIM32 (Q13049)    | MAAAAAS-----HLNLDALREVLKTCPICMESFTEQ-----LRPKLL-HGHTFRCAGLITPNGRESV            | VRCFEHRHPSA-----QRNLR-PNRLLTKVAEMAQOH--PG     |
| TRIM33 (Q9UPN9)    | -----AGPPGPPASLLDTCVAVCQSLQSR-----EAEPKLL-PGLHSPFCAGLIPAPORYLM                 | IRCFVCRQCR-----QIDLV-DNYFVKDTEAFSSS--DE       |
| TRIM34 (Q9BY74)    | MA-----SKILLNVQEVTPICILELLTE-----PLSL-DGHSFRCAGLITPNGRESV                      | SSCFVCRISYQ-----PENIR-PNRIVANIVEKLEVV--KL     |
| TRIM35 (Q9DF04)    | MERSFDVY-----PQPSRSFKLELLCAVYDFPFD-----AVTL-PGSHNFRCAGLTRVYCEIPG               | FFCFEHRHPSA-----PAAIR-PHWALARITEKTRR--RL      |
| TRIM36 (Q9NQ66)    | NSESGEMSEFGYIMELIA-----KGVVTIKNIRELTPAKKELFTH-----PILL-PGSHNFRCAGLTRVYCEIPG    | FFCFEHRHPSA-----PAAIR-PHWALARITEKTRR--RL      |
| TRIM37 (Q94972)    | ND-----EQSVTIAEVRFCPIQEKLRD-----ARLCPHSSKLCQSPKIRWLTQR                         | AQCFHCRALPQ-----LRELV-NCRWAEVETQOLDL--QL      |
| TRIM38 (Q00635)    | MAS-----TSTKMKMEEATFCISLIMNT-----PVSI-NGHSYCHLITDFKFNPS                        | FCCFQRAFPFH-----MDSLR-PNKGLSGLIEALKET--DA     |
| TRIM39 (Q9HCM9)    | MAETSLLEAGASAAT-----AAALENLQVEASCSVGLVYLKE-----PVII-EGGNFRCAGLITPNGRESV        | FFCFEHRHPSA-----PAAIR-PHWALARITEKTRR--RL      |
| TRIM40 (Q6P9F5)    | MI-----PLQKDNQEGVCPICIQESLKE-----AVST-NGHLLFRVGLTQHVKEAS                       | FCCFPLCKPCS-----EVLGL-TGICENHQRVCRCF--CE      |
| TRIM41 (Q8WV44)    | MAAVAMT-----PNPVQTLQEEAVCAICLDYFTD-----PVSI-DGHNFRCAGLTRVYCEIPG                | FTCFQCRKSPF-----RSLFR-PNRQLANVVENIERL--QL     |
| TRIM42 (Q81W25)    | -----PANSHLVNHLNCPVMSRLRLH-----PMLP-PGNLSLCKKLRQLQKHAQ                         | LICFVCRSHSCPMYSN-KMQLP-ENYHLGRITKRYMQE--HG    |
| TRIM43 (Q96B03)    | ND-----SDFSHAFQKELSCVILNLYVD-----PVTI-CGHSFRCAGLITPNGRESV                      | ANCFAPREPSF-----KMDFK-TNILLKNIITAKRA--SL      |
| TRIM45 (Q9H8W5)    | MSENKFLPLGFPVSKLT-----SGTALNSGKTHCPILGLFKA-----PILL-PGLTFTCEERLQNYIPAQS        | ILCFVDAQVQLPMPG-VKAIT-IDHILVNDVMSLSR--GS      |
| TRIM46 (Q724K8)    | MAEGEDMQFTSMDALV-----RISTSMRMEKELLPVQCEMYKQ-----PVLV-PHTNVQAGARVGLQGG          | FFCFEHRHPSA-----PAAIR-PHWALARITEKTRR--RL      |
| TRIM47 (Q96L04)    | -----MDSGSFFSFCPIGLELRE-----PVTL-PGSHNFRCAGLTRVYCEIPG                          | ARCFLQCFPPD-----GLQLR-KNHLSELGLRQGS--GP       |
| TRIM48 (Q81W24)    | NN-----SGISQVQRELTFCPIQMNFFD-----PVTI-DGHSFRCAGLITPNGRESV                      | TQCFEIKTQ-----QNLK-TNHLKMASLARKA--SL          |
| TRIM49 (P0C125)    | NN-----SGIIQVQFQELTFCPIQMNFFD-----PVTI-DGHSFRCAGLITPNGRESV                     | VQCFSEKTSKTE-----QNLK-TNHLKMASLARKA--SL       |
| TRIM50 (Q8X6T4)    | MAM-----QVSLLELEDLTCPIGLEVFKE-----PMLQ-QGHSYCKGGLVLSLCHLD                      | LRCFVQRAVD-----GSSSL-PNVSLARVIEALRLP--GD      |
| TRIM51 (Q9BSJ1)    | MN-----SGIIQVQFQELTFCPIQMNFFD-----PVTI-DGHSFRCAGLITPNGRESV                     | AQCFSEKTSKTE-----QNLK-TNHLKMASLARKA--SL       |
| TRIM54 (Q9BYV2)    | MNFTVGF--KPLLDG-----AHSMDNLEKGLTCPICLEMFSK-----PVVILP-QGNLRCAGLITPNGRESV       | FRCPSCRHVEVLDHRG-VYGLQ-RNLLVNIIDYKQE--SS      |
| TRIM55 (Q9BYV6)    | MSASLNY--KSFSSK-----QOTMDNLEKGLTCPICLEMFSK-----PVVILP-QGNLRCAGLITPNGRESV       | FRCPSCRHVEVLDHRG-VYGLQ-RNLLVNIIDYKQE--SS      |
| TRIM56 (Q9BRZ2)    | MVSHG-----SSP-----SILLEALSDFLACKTCLEQLRA-----PKTL-PGLTFTCEERLQNYIPAQS          | VRCFEONQAYNQ-----KPGLE-KNKLKTNIVEKFNAL--HV    |
| TRIM57/59 (Q81WR1) | -----MHNFEELTFCPIQYIFED-----PVVL-PGSHNFRCAGLTRVYCEIPG                          | LKCFNORSITVEIAPFG-IESLP-PNWFALRAIIEYKQP--AC   |
| TRIM58 (Q8NG06)    | MAM-----APPGERLREARCPVLDLQK-----PVSV-DGHSFRCAGLITPNGRESV                       | YACFECRELSLSP-----QRNLR-PNRHLANIVRRLREVV--KL  |
| TRIM60 (Q495X7)    | MEF-----VTALVNLQEESSFCPIGLEYLKQ-----PVTI-NGGNFRCAGLITPNGRESV                   | FFCFEHRHPSA-----PAAIR-PHWALARITEKTRR--RL      |
| TRIM61 (Q5EBN2)    | MEF-----VTALADLRAEASFCPIGLDYLD-----PVTI-SGHNFRCAGLTRVYCEIPG                    | FFCFEHRHPSA-----PAAIR-PHWALARITEKTRR--RL      |
| TRIM62 (Q9BV03)    | NA-----CSLDELLTSCISLQYQD-----PVSL-EGHSFRCAGLITPNGRESV                          | RDCEFRRTFA-----EALA-PSLKLANIVRRLREVV--KL      |
| TRIM63 (Q96901)    | NDYKS-----SLIQD-----GNPMENLEKGLTCPICLEMFSK-----PVVILP-QGNLRCAGLITPNGRESV       | FRCFEHRHPSA-----PAAIR-PHWALARITEKTRR--RL      |
| TRIM64 (A6NGJ6)    | ND-----SDDIQVQFQELTFCPIQMNFFD-----PVTI-DGHSFRCAGLITPNGRESV                     | MRCFSPKRISE-----KPNFN-TNVLKMASLARKA--SL       |
| TRIM65 (Q6PJ69)    | MA-----AQLLEKLTCAICLGLYQD-----PVTL-PGSHNFRCAGLTRVYCEIPG                        | KACFECREPPD-----GAELR-RNVSLGVLEVVRAG--PA      |
| TRIM68 (Q6AZ21)    | MDP-----TALVEAIVVEVAFICMTFLRE-----PMSI-DGHSFRCAGLITPNGRESV                     | YTCFQRAVYQA-----RQLHL-KNVTLCNVVEQFLQA--DL     |
| TRIM69 (Q86W76)    | MEVSTNPSNIDPGDYVEMNDSITHLPSKVVIQDIIMELHCPICNDWFRD-----PMLL-SGHNFRCAGLTRVYCEIPG | ITCFEHRSLLDLDRG-LRGFF-PNRVLGGVDRYQQS--KA      |
| TRIM71 (Q2Q1W2)    | M-----ASFPEFDQFLCILEKEMCGSPAGAAARRLHLV-PGLHSPFCAGLIPAPORYLM                    | LRCFVQRAVYQA-----RQLHL-KNVTLCNVVEQFLQA--DL    |
| TRIM72 (Q6PM05)    | MS-----AAPGLLHQLSCLPILQLLFD-----PMLL-SGHNFRCAGLTRVYCEIPG                       | YLCFQRAVYQA-----RQLHL-KNVTLCNVVEQFLQA--DL     |
| TRIM73 (Q86VU7)    | MAM-----QVSLLELEDLTCPIGLEVFKE-----PMLQ-QGHSYCKGGLVLSLCHLD                      | VRCFEONQAYNQ-----KPGLE-KNKLKTNIVEKFNAL--HV    |
| TRIM74 (Q86U6V)    | MAM-----QVSLLELEDLTCPIGLEVFKE-----PMLQ-QGHSYCKGGLVLSLCHLD                      | VRCFEONQAYNQ-----KPGLE-KNKLKTNIVEKFNAL--HV    |
| TRIM75 (A6NK02)    | MAM-----AAALTLQAEAKSICILDYLD-----PVTI-EGGNFRCAGLITPNGRESV                      | FFCFEHRHPSA-----PAAIR-PHWALARITEKTRR--RL      |
| TRIM77 (I1YAF6)    | MA-----SAITQCSTSELTSIGTDYLD-----PVTI-CGHSFRCAGLITPNGRESV                       | NCFVCRISYQ-----PENIR-PNRIVANIVEKLEVV--KL      |

[ ... ]

**Figure S1. Alignment of TRIM family RING domains**

TRIM family RING domain alignment based on secondary structure prediction and available structural coordinates performed by PROMALS3D (52). Residues coloured in red and blue represents amino acids either observed in, or with a propensity to form,  $\alpha$ -helical and  $\beta$ -strand conformations, respectively.
